# Supplementary material
Source: PubMed Central journal article supplement (PMC3640671)
Supplement: NIHMS434720-supplement-36960_1_supp_485435_md6z8c.pdf [file NIHMS434720-supplement-36960_1_supp_485435_md6z8c.pdf]

## Supplementary Tables

**Supplementary Table S1. Combination treatment reduces the IC<sub>50</sub> values for alisertib and paclitaxel**

| Drug(s)              | Molar Ratio | Concentration (nM ± SE) |                  |
|----------------------|-------------|-------------------------|------------------|
|                      |             | IC <sub>30</sub>        | IC <sub>50</sub> |
| Alisertib            | --          | 67 ± 7                  | 315 ± 91         |
| Alisertib:paclitaxel | 40:1        | 22 ± 2                  | 48 ± 4           |
|                      | 16:1        | 18 ± 2                  | 35 ± 4           |
| Paclitaxel           | --          | 2.3 ± 0.3               | 4 ± 0.6          |
| Alisertib:paclitaxel | 40:1        | 0.5 ± 0.1               | 1.2 ± 0.1        |
|                      | 16:1        | 1.1 ± 0.1               | 2.2 ± 0.2        |

**Supplementary Table S2. Effect of single-agent and combination therapy on mitotic cell population**

| Treatment                       | Mean number of pHisH3 <sup>Ser10+</sup><br>cells per field ± SE | <i>P</i> |
|---------------------------------|-----------------------------------------------------------------|----------|
| vehicle                         | 1.1 ± 0.088                                                     | --       |
| 20 mg/kg alisertib              | 1.1 ± 0.096                                                     | 0.7046   |
| 30 mg/kg M alisertib            | 0.98 ± 0.056                                                    | 0.2590   |
| 5 mg/kg paclitaxel              | 0.82 ± 0.049                                                    | 0.0084   |
| 20 mg/kg alisertib + paclitaxel | 0.92 ± 0.060                                                    | 0.0933   |

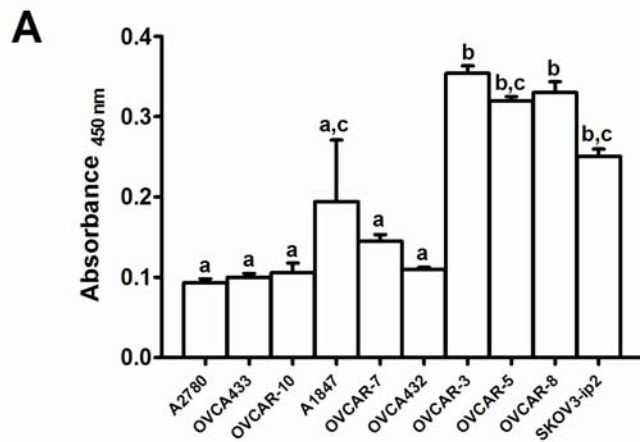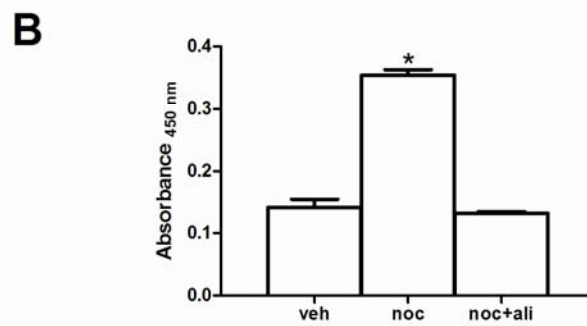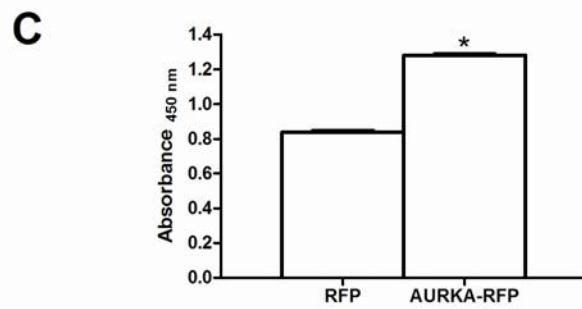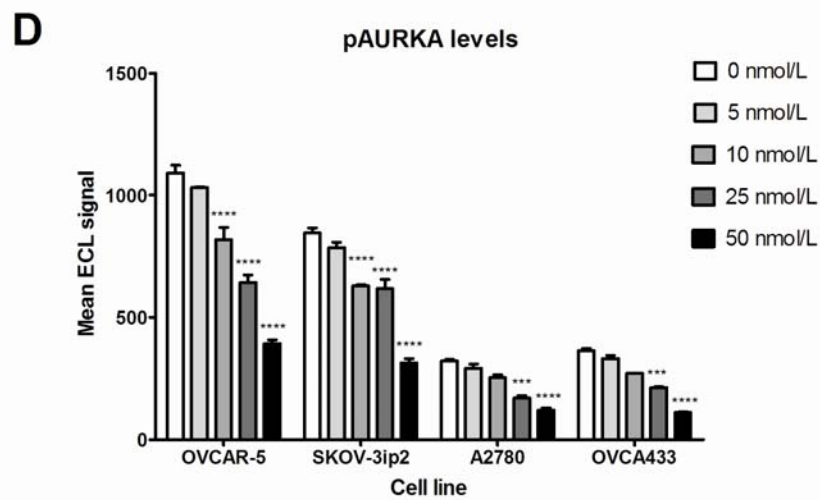

**Figure S1.** A) pAURKA<sup>T288</sup> levels detected by ELISA in EOC cell lines. Data was analyzed using a one-way ANOVA followed by Tukey's multiple comparison tests. Bars labeled with different letters are statistically significant ( $P < 0.05$ ). Bars labeled with the same letter (e.g., "a") are not significantly different. B) Increased pAURKA<sup>T288</sup> levels ( $*P < 0.05$ ) in OVCAR-3 cells treated with Nocodazole compared to vehicle; concomitant treatment with alisertib (ali, 60 nmol/L) blocked the effect. C) Increased pAURKA<sup>T288</sup> levels (HEK293 cells) after transient transfection of *AURKA-RFP* compared to *RFP* control ( $*P < 0.05$ ). D) pAURKA<sup>T288</sup> levels detected by electrochemiluminescent ELISA in EOC cell lines treated with increasing doses of alisertib (0, 5, 10, 25 and 50 nmol/L) showed a dose-dependent decrease in pAURKA<sup>T288</sup>. Data was analyzed using a two-way ANOVA followed by Bonferroni post-tests. Bars labeled with asterisks are significantly different from untreated cells ( $***P < 0.001$  and  $****P < 0.0001$ ).

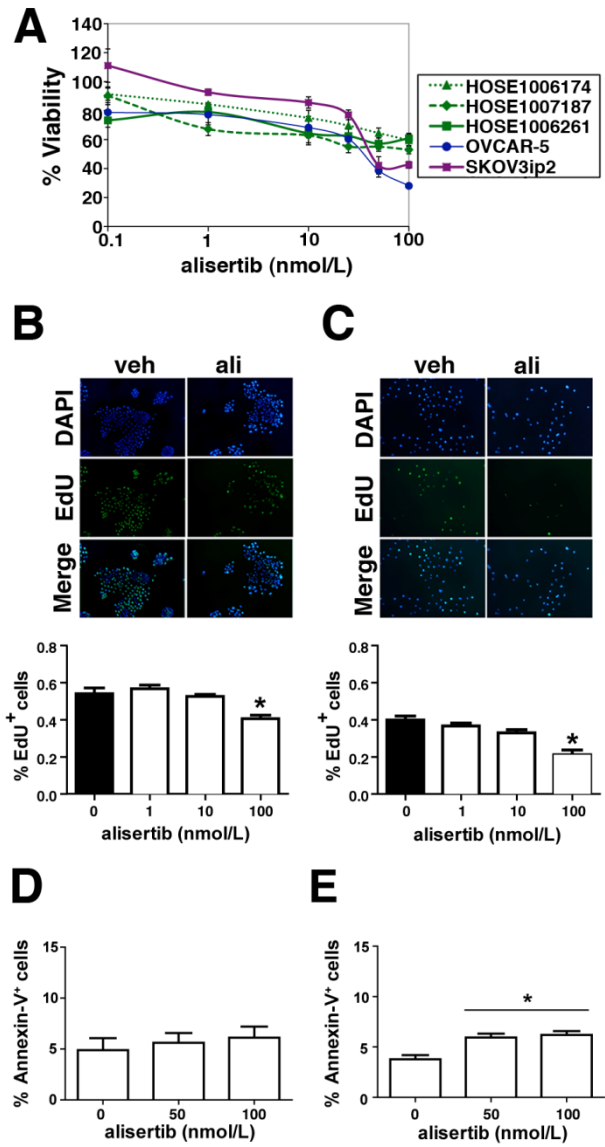

**Figure S2.** A) Effects of alisertib on proliferation of primary HOSE, OVCAR-5, and SKOV3ip2 cells. EdU incorporation in OVCAR-5 (B) and SKOV3ip2 (C) cells treated with alisertib for 48 h. Annexin V+ cells in OVCAR-5 (D) and SKOV3ip2 cells (E) after alisertib treatment (\* $P < 0.01$ ).

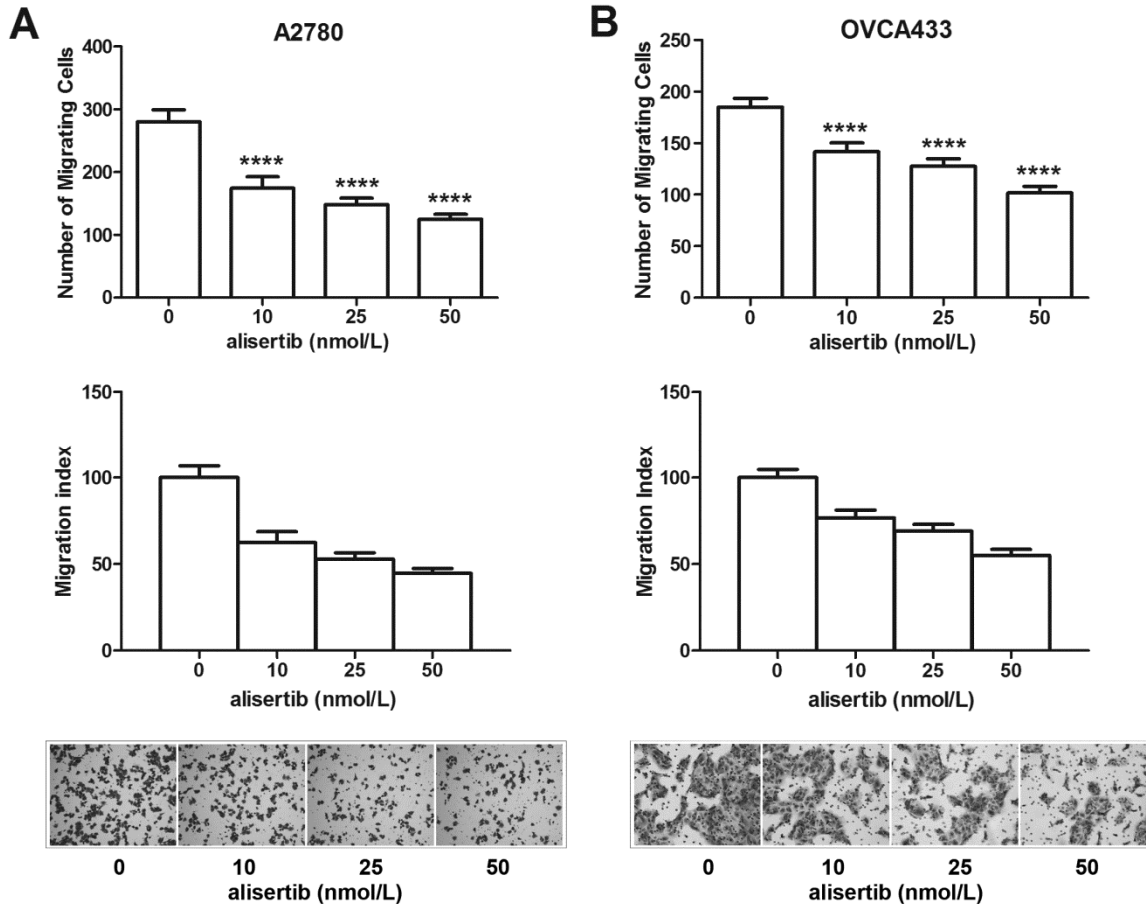

**Figure S3. Figure 2. RNAi-mediated silencing of *AURKA* inhibits ovarian carcinoma cell migration.** A2780 (A) and OVCA433 (B) cells were transiently transfected with non-targeting scrambled (SCR) *AURKA*-specific siRNAs (si-28 and si-29) for 48 h, and then subjected to migration assays. Bright-field images (10X) of migrating cells from representative inserts are shown. Quantification of migration for OVCAR-5 (A) and SKOV3ip2 (B) is depicted in the top graphs as the mean number of migrating cells  $\pm$  SE ( $n = 3$ ). Bars labeled with asterisks are statistically significant (\*\*\*\* $P < 0.0001$ ) as analyzed by one-way ANOVA Kruskal-Wallis test followed by Dunn's multiple comparison test and Mann-Whitney tests comparing individual columns. The migration index is depicted in the bottom graphs as the means relative to SCR siRNA-transfected cells  $\pm$  SE.

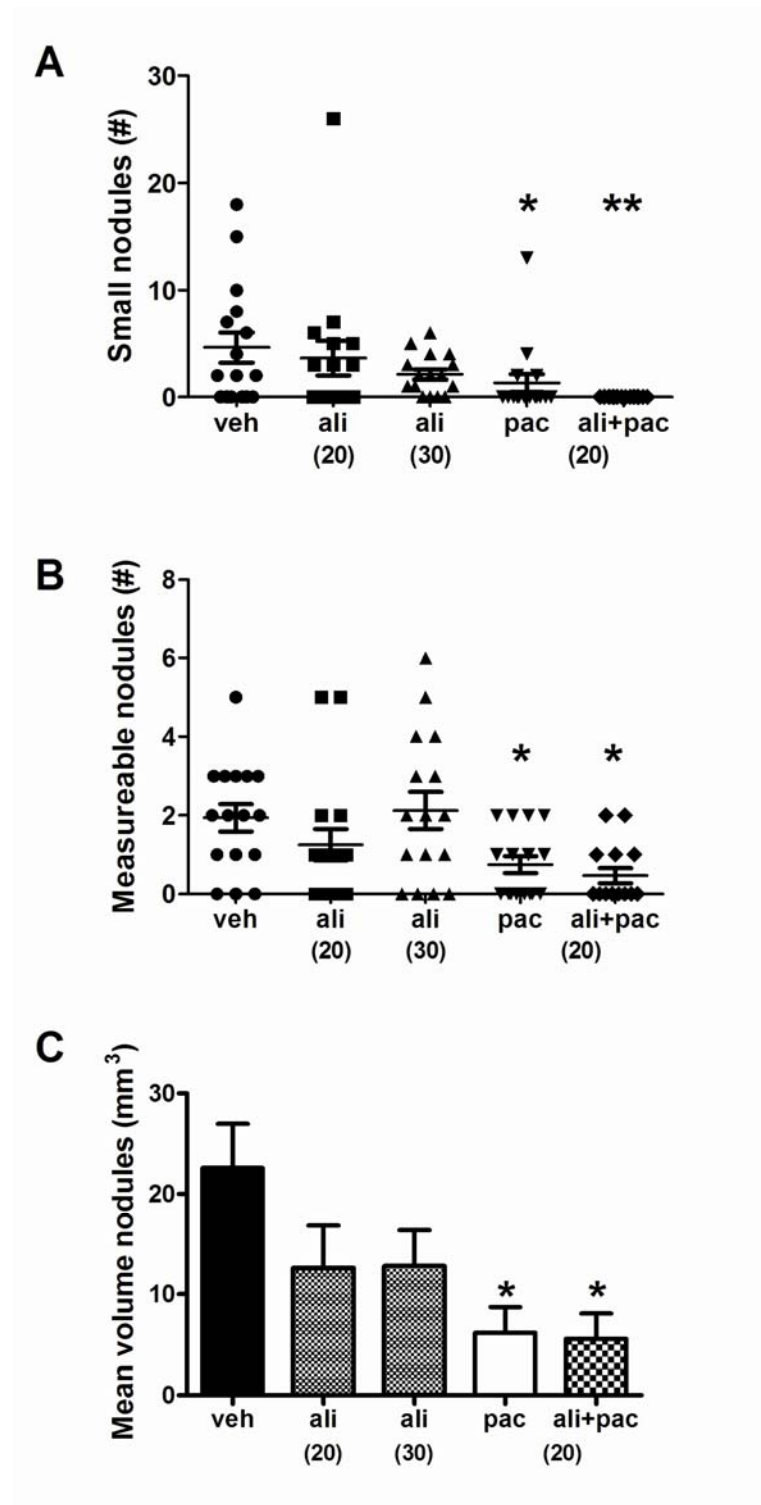

**Supplementary Figure S4.** Mean number and volume of tumor nodules. A) Number of small (<1 mm<sup>3</sup>) tumor nodules. B) Number of measurable (>1 mm<sup>3</sup>) tumor nodules. C) The mean volume of tumor nodules. Groups labeled with asterisks are statistically significant from vehicle control (\**P* < 0.05 and \*\**P* < 0.01).

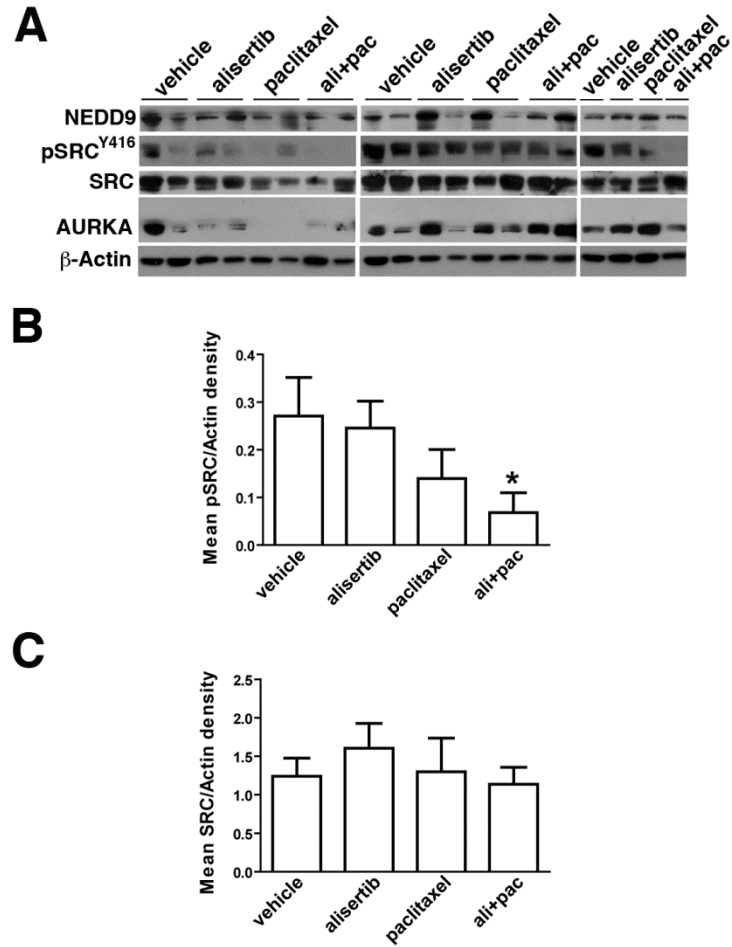

**Supplementary Figure S5.** A) Total proteins were immunoblotted for NEDD9, pSRC<sup>Y416</sup>, total SRC, total AURKA and  $\beta$ -Actin. Relative levels of pSRC<sup>Y416</sup> to  $\beta$ -Actin (B) and total SRC to  $\beta$ -Actin (C) were quantified by gel densitometry. ( $P < 0.05$ ).
